# Supplementary material
Source: PubMed Central journal article supplement (PMC3697592)
Supplement: IAI.00269-13_zii999090204so1.pdf [file IAI.00269-13_zii999090204so1.pdf]

SUPPLEMENTAL TABLE 1. HLA homozygosity associations with antibody responses to anthrax protective antigen

| Parameter                   | Level        | N   | Median (IgG, $\mu\text{g/ml}$ ) | Q1    | Q3    | P-value |
|-----------------------------|--------------|-----|---------------------------------|-------|-------|---------|
| HLA Locus                   |              |     |                                 |       |       |         |
| A (4 digit)                 | Heterozygous | 229 | 236.0                           | 121.0 | 390.9 | 0.199   |
|                             | Homozygous   | 42  | 215.2                           | 84.3  | 361.7 |         |
| B (4 digit)                 | Heterozygous | 255 | 226.8                           | 113.6 | 381.1 | 0.518   |
|                             | Homozygous   | 16  | 260.9                           | 144.7 | 435.7 |         |
| C (4 digit)                 | Heterozygous | 246 | 225.7                           | 110.5 | 381.1 | 0.404   |
|                             | Homozygous   | 25  | 288.2                           | 178.0 | 418.0 |         |
| DRB1 (4 digit)              | Heterozygous | 245 | 228.3                           | 116.9 | 388.6 | 0.866   |
|                             | Homozygous   | 26  | 217.9                           | 104.6 | 323.4 |         |
| DPA1 (4 digit)              | Heterozygous | 101 | 242.2                           | 119.6 | 451.3 | 0.500   |
|                             | Homozygous   | 170 | 222.6                           | 113.6 | 362.4 |         |
| DQA1 (4 digit)              | Heterozygous | 221 | 224.6                           | 111.3 | 391.6 | 0.904   |
|                             | Homozygous   | 50  | 235.4                           | 141.6 | 362.6 |         |
| DPB1 (4 digit)              | Heterozygous | 211 | 236.0                           | 107.4 | 391.6 | 0.741   |
|                             | Homozygous   | 60  | 219.4                           | 118.6 | 381.9 |         |
| DQB1 (4 digit)              | Heterozygous | 229 | 237.6                           | 118.4 | 406.1 | 0.259   |
|                             | Homozygous   | 42  | 207.0                           | 101.7 | 311.3 |         |
| Any Locus (4 digit)         | Heterozygous | 69  | 260.2                           | 132.5 | 451.3 | 0.109   |
|                             | Homozygous   | 202 | 222.6                           | 110.5 | 362.6 |         |
| Number Homozygous (4 digit) | 0            | 69  | 260.2                           | 132.5 | 451.3 | 0.413   |
|                             | 1            | 81  | 208.9                           | 101.9 | 347.9 |         |
|                             | 2            | 68  | 233.2                           | 146.4 | 428.3 |         |
|                             | 3            | 25  | 203.6                           | 101.4 | 314.6 |         |
|                             | 4+           | 28  | 213.1                           | 120.4 | 317.4 |         |
| A (2 digit)                 | Heterozygous | 228 | 236.7                           | 120.3 | 391.3 | 0.181   |
|                             | Homozygous   | 43  | 214.9                           | 84.3  | 361.7 |         |
| B (2 digit)                 | Heterozygous | 250 | 227.6                           | 113.6 | 381.1 | 0.325   |
|                             | Homozygous   | 21  | 233.5                           | 124.4 | 399.2 |         |
| C (2 digit)                 | Heterozygous | 234 | 223.0                           | 110.5 | 382.7 | 0.265   |
|                             | Homozygous   | 37  | 258.0                           | 178.0 | 399.2 |         |

|                             |              |     |       |       |       |              |
|-----------------------------|--------------|-----|-------|-------|-------|--------------|
| DRB1 (2 digit)              | Heterozygous | 229 | 237.6 | 119.5 | 391.7 | <b>0.028</b> |
|                             | Homozygous   | 42  | 180.5 | 82.6  | 311.3 |              |
| DPA1 (2 digit)              | Heterozygous | 90  | 236.5 | 107.4 | 456.9 | 0.758        |
|                             | Homozygous   | 181 | 224.2 | 116.9 | 362.4 |              |
| DQA1 (2 digit)              | Heterozygous | 186 | 235.9 | 116.9 | 413.3 | 0.082        |
|                             | Homozygous   | 85  | 223.4 | 105.9 | 328.3 |              |
| DPB1 (2 digit)              | Heterozygous | 185 | 242.2 | 111.3 | 409.7 | 0.669        |
|                             | Homozygous   | 86  | 215.8 | 116.2 | 348.2 |              |
| DQB1 (2 digit)              | Heterozygous | 181 | 242.2 | 119.5 | 406.1 | 0.153        |
|                             | Homozygous   | 90  | 220.7 | 110.5 | 319.8 |              |
| Any Locus (2 digit)         | Heterozygous | 44  | 259.0 | 113.5 | 464.0 | 0.329        |
|                             | Homozygous   | 227 | 224.6 | 113.6 | 370.7 |              |
| Number Homozygous (2 digit) | 0            | 44  | 259.0 | 113.5 | 464.0 | 0.056        |
|                             | 1            | 57  | 260.6 | 106.9 | 413.3 |              |
|                             | 2            | 78  | 235.9 | 141.6 | 380.5 |              |
|                             | 3            | 39  | 214.9 | 110.5 | 381.1 |              |
|                             | 4+           | 53  | 215.5 | 104.6 | 314.6 |              |

P-values values for antibody levels were based on analyses using a logarithmic transformation.

Statistically significant P-values are in bold type ( $P < 0.05$ ). Linear regression analysis adjusted for gender, age groups, study site, route of immunization, time between vaccination, time between blood draw and a number of AVA doses.
